# Supplementary material for: Magnetic phase transition regulated by an interface coupling effect in CrBr3/electride Ca2N van der Waals heterostructures
Source: Royal Society of Chemistry journal article supplement (doi:10.1039/d4cp01407c), 2024-01-01
Supplement: d4cp01407c1.pdf [file d4cp01407c1.pdf]

## Supplementary Information

### **Magnetic phase transition regulated by interface coupling effect in CrBr<sub>3</sub>/electride Ca<sub>2</sub>N van der Waals heterostructures**

Zhengyu Yin, Baozeng Zhou\*

*Tianjin Key Laboratory of Film Electronic & Communicate Devices, School of Integrated Circuit  
Science and Engineering, Tianjin University of Technology, Tianjin 300384, China*

\*Corresponding Authors

[baozeng@tju.edu.cn](mailto:baozeng@tju.edu.cn) (B. Zhou)

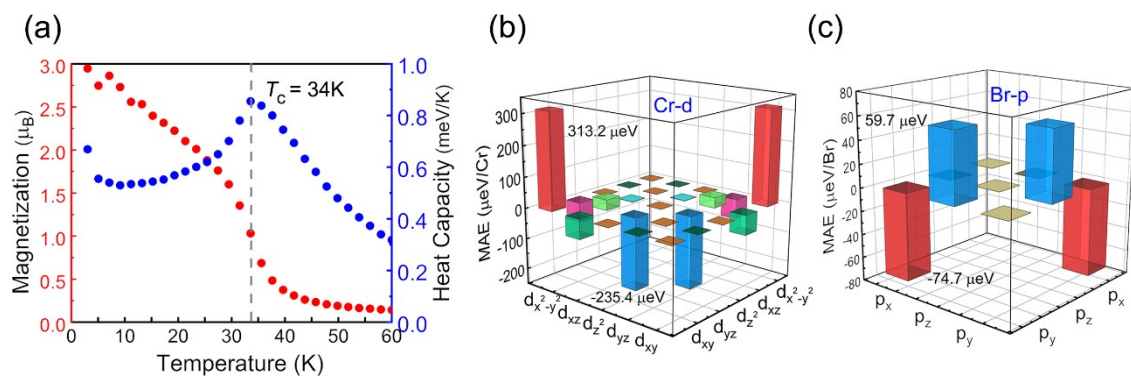

**Fig. S1** (a) The magnetization and heat capacity as functions of temperature for  $\text{CrBr}_3$  monolayer.

Orbital-resolved MAE for the (b) Cr and (c) Br ion in the  $\text{CrBr}_3$  monolayer.

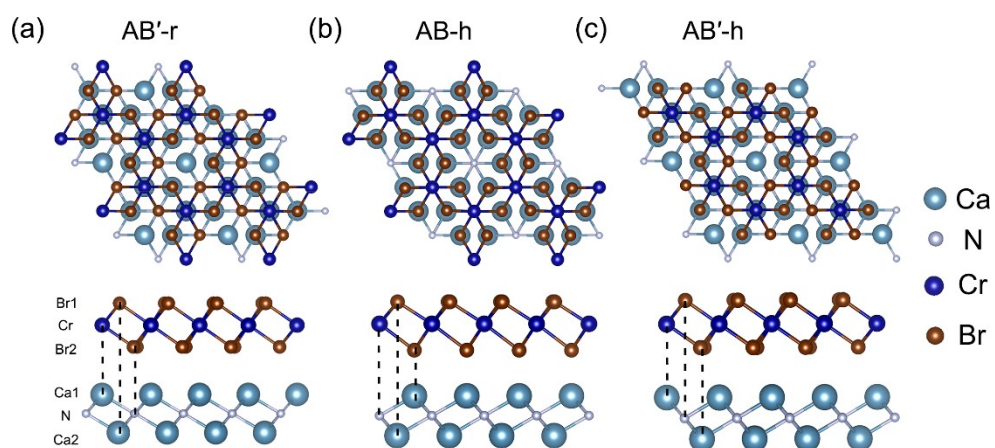

**Fig. S2** The top and side views of  $\text{CrBr}_3/\text{Ca}_2\text{N}$  heterostructure with different stacking orders: (a)  $\text{AB}'\text{-r}$ , (b)  $\text{AB-h}$ , and (c)  $\text{AB}'\text{-h}$ .

**Table S1.** The energy of FM and various AFM states with different stacking orders for the CrBr<sub>3</sub>/Ca<sub>2</sub>N heterostructure. The light gray part indicates the most stable energy ground state under each structure.

| <b>Model</b>                         | <b>AB-r</b> | <b>AB'-r</b> | <b>AB-h</b> | <b>AB'-h</b> |
|--------------------------------------|-------------|--------------|-------------|--------------|
| $E_{\text{FM}} \text{ (eV)}$         | -320.6      | -318.4       | -312.2      | -320.6       |
| $E_{\text{Nccf-AFM}} \text{ (eV)}$   | -321.0      | -319.2       | -311.6      | -319.5       |
| $E_{\text{zigzag-AFM}} \text{ (eV)}$ | -316.2      | -319.3       | -312.7      | -311.8       |
| $E_{\text{stripy-AFM}} \text{ (eV)}$ | -311.1      | -309.9       | -300.4      | -308.0       |

**Table S2.** The binding energies ( $E_b$ ) of the  $\text{CrBr}_3/\text{Ca}_2\text{N}$  heterostructures in the most stable ground state under different stacking orders.

|                                   | <b>AB-r</b> (Neel-AFM) | <b>AB'-r</b> (zigzag-AFM) | <b>AB-h</b> (zigzag-AFM) | <b>AB'-h</b> (FM) |
|-----------------------------------|------------------------|---------------------------|--------------------------|-------------------|
| <b><math>E_b</math> (eV/atom)</b> | -0.474                 | -0.425                    | -0.246                   | -0.457            |

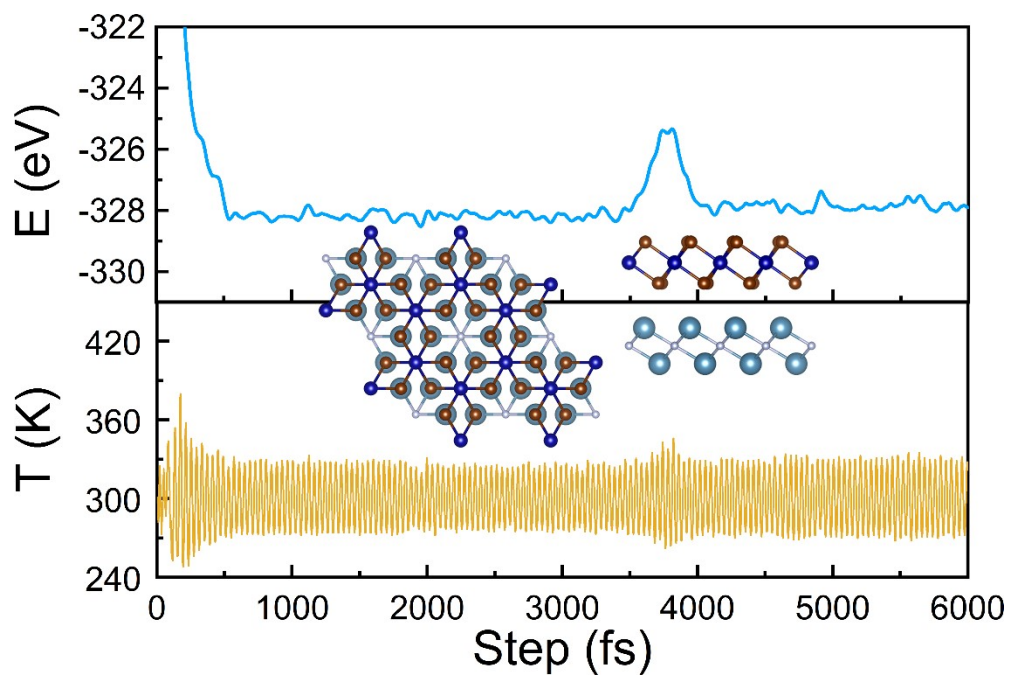

**Fig. S3** The fluctuations of energy and temperature as well as the final configuration of the AB-r heterostructure are obtained from AIMD simulation.

**Table S3.** The exchange coupling parameters ( $J_1$ ,  $J_2$ ), Atomic Magnetic Moments ( $M_{\text{Cr}}$ ), Curie temperature ( $T_C$ ), Magnetic Anisotropy Energy (MAE), and Energy Difference between FM and AFM Spin Ordering ( $\Delta E_{\text{FM-AFM}}$ ) of the  $2 \times 2 \times 1$  supercell for the  $\text{CrBr}_3$  with the electron/hole injection ( $Q_e$ ).

| $Q_e$ (e/u.c) | $J_1$ (meV) | $J_2$ (meV) | $M_{\text{Cr}}$ ( $\mu_B$ ) | $T_C$ (K) | MAE ( $\mu\text{eV}/\text{Cr}$ ) | $\Delta E_{\text{FM-AFM}}$ (meV) |
|---------------|-------------|-------------|-----------------------------|-----------|----------------------------------|----------------------------------|
| 1             | 28.66       | -1.02       | 3.355                       | 32        | 375                              | -68                              |
| 0.75          | 26.75       | 0.37        | 3.327                       | 34        | 282                              | -78                              |
| 0.5           | 24.83       | 1.38        | 3.299                       | 35        | 166                              | -84                              |
| 0.25          | 23.14       | 2.00        | 3.271                       | 36        | 26                               | -86                              |
| 0             | 21.73       | 2.26        | 3.243                       | 34        | -156                             | -85                              |
| -0.25         | 24.97       | 3.41        | 3.239                       | 46        | -1172                            | -107                             |
| -0.5          | 28.14       | 4.74        | 3.233                       | 55        | -1788                            | -130                             |
| -0.75         | 31.47       | 6.14        | 3.23                        | 66        | -2177                            | -155                             |
| -1            | 34.63       | 7.63        | 3.225                       | 75        | -2464                            | -180                             |

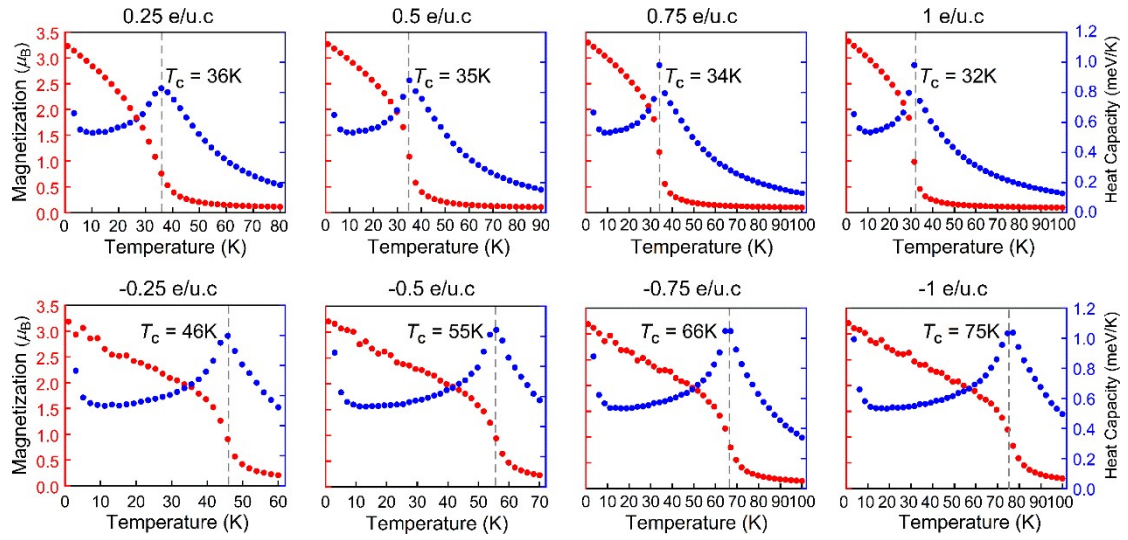

**Fig. S4** The magnetization and heat capacity as functions of temperature for CrBr<sub>3</sub> monolayer with charge doping.
